# Supplementary material for: Dextran-Based Injectable Hydrogel Composites for Bone Regeneration
Source: MDPI journal article supplement (doi:10.3390/polym15234501), 2023-11-23
Supplement: s1 [file s1]

# Supplementary Information

## Dextran-based injectable hydrogel composites for bone regeneration

Patrícia Alves <sup>1,\*</sup>, Ana Filipa Simão <sup>1</sup>, Mariana F.P. Graça <sup>2</sup>, Marcos J. Mariz <sup>1</sup>, Ilídio J. Correia <sup>1,2</sup> and Paula Ferreira <sup>1,3</sup>

<sup>1</sup> University of Coimbra, CIEPQPF, Department of Chemical Engineering, Faculty of Sciences and Technology, Rua Sílvio Lima, 3030-790 Coimbra, Portugal; [palves@eq.uc.pt](mailto:palves@eq.uc.pt) (P.A.), [gouveia.fii@gmail.com](mailto:gouveia.fii@gmail.com) (A.F.S.) [mmariz@eq.uc.pt](mailto:mmariz@eq.uc.pt) (M.J.M.)

<sup>2</sup> CICS-UBI, Health Sciences Research Centre, Faculty of Health Sciences, University of Beira Interior, 6200-506 Covilhã, Portugal; [marianaf\\_g@hotmail.com](mailto:marianaf_g@hotmail.com) (M.F.P.G.), [icorreia@fcsaude.ubi.pt](mailto:icorreia@fcsaude.ubi.pt) (I.J.C.)

<sup>3</sup> Polytechnic Institute of Coimbra, Applied Research Institute, Rua da Misericórdia, Lagar dos Cortiços – S. Martinho do Bispo, 3045-093 Coimbra, Portugal; [paula.ferreira@ipc.pt](mailto:paula.ferreira@ipc.pt) (P.F.)

\* Correspondence: [palves@eq.uc.pt](mailto:palves@eq.uc.pt) (P.A.)

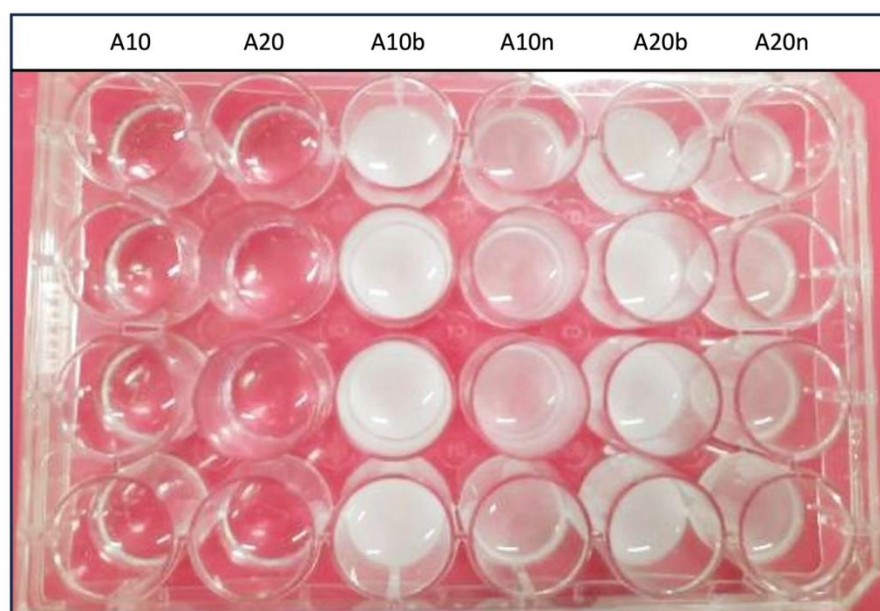

**Figure S1.** Image of the obtained hydrogels with different compositions.

**Table S1.** Statistical analysis of the swelling results. \* $p < 0.1$ , \*\* $p < 0.01$ , \*\*\* $p < 0.001$ , \*\*\*\* $p < 0.0001$ , n.s. = non significant.

| Multiple group comparisons   | Statistical analysis |
|------------------------------|----------------------|
| A10 - pH 7,4 vs A10 - pH 5   | ****                 |
| A10 - pH 7.4 vs A10 - pH 9   | ***                  |
| A10 - pH 7.4 vs A10 - pH 2   | ****                 |
| A10 - pH 5 vs A10 - pH 9     | ****                 |
| A10 - pH 5 vs A10 - pH 2     | **                   |
| A10 - pH 9 vs A10 - pH 2     | ****                 |
| A20 - pH 7,4 vs A20 - pH 5   | **                   |
| A20 - pH 7.4 vs A20 - pH 9   | n.s.                 |
| A20 - pH 7.4 vs A20 - pH 2   | **                   |
| A20 - pH 5 vs A20 - pH 9     | n.s.                 |
| A20 - pH 5 vs A20 - pH 2     | n.s.                 |
| A20 - pH 9 vs A20 - pH 2     | n.s.                 |
| A10b - pH 7,4 vs A10b - pH 5 | ****                 |
| A10b - pH 7.4 vs A10b - pH 9 | ****                 |
| A10b - pH 7.4 vs A10b - pH 2 | ****                 |
| A10b - pH 5 vs A10b - pH 9   | n.s.                 |
| A10b - pH 5 vs A10b - pH 2   | n.s.                 |
| A10b - pH 9 vs A10b - pH 2   | ***                  |
| A10n - pH 7,4 vs A10n - pH 5 | *                    |
| A10n - pH 7.4 vs A10n - pH 9 | **                   |
| A10n - pH 7.4 vs A10n - pH 2 | ****                 |
| A10n - pH 5 vs A10n - pH 9   | n.s.                 |
| A10n - pH 5 vs A10n - pH 2   | ***                  |
| A10n - pH 9 vs A10n - pH 2   | **                   |
| A20b - pH 7,4 vs A20b - pH 5 | n.s.                 |
| A20b - pH 7.4 vs A20b - pH 9 | n.s.                 |
| A20b - pH 7.4 vs A20b - pH 2 | n.s.                 |
| A20b - pH 5 vs A20b - pH 9   | n.s.                 |
| A20b - pH 5 vs A20b - pH 2   | n.s.                 |
| A20b - pH 9 vs A20b - pH 2   | n.s.                 |
| A20n - pH 7,4 vs A20n - pH 5 | ****                 |
| A20n - pH 7.4 vs A20n - pH 9 | ****                 |
| A20n - pH 7.4 vs A20n - pH 2 | ****                 |
| A20n - pH 5 vs A20n - pH 9   | n.s.                 |
| A20n - pH 5 vs A20n - pH 2   | n.s.                 |
| A20n - pH 9 vs A20n - pH 2   | n.s.                 |

**Table S2.** Statistical analysis of the swelling results at pH 7.4. \*p< 0.1, \*\*p< 0.01, \*\*\*p< 0.001, \*\*\*\*p< 0.0001, n.s. = non significant.

| Multiple group comparisons    | Statistical analysis |
|-------------------------------|----------------------|
| A10_ pH 7.4 vs. A20_ pH 7,4   | *                    |
| A10_ pH 7.4 vs. A10b_ pH 7,4  | **                   |
| A10_ pH 7.4 vs. A10n_ pH 7,4  | ns                   |
| A20_ pH 7,4 vs. A20b_ pH 7,4  | ns                   |
| A20_ pH 7,4 vs. A20n_ pH 7,4  | ns                   |
| A10b_ pH 7,4 vs. A20b_ pH 7,4 | ****                 |
| A10n_ pH 7,4 vs. A20n_ pH 7,4 | ns                   |
| A10b_ pH 7,4 vs. A10n_ pH 7,4 | **                   |
| A20b_ pH 7,4 vs. A20n_ pH 7,4 | **                   |
